# Supplementary material
Source: MDPI journal article supplement (https://www.mdpi.com/2379-139X/8/5/190)
Supplement: s1 [file s1]

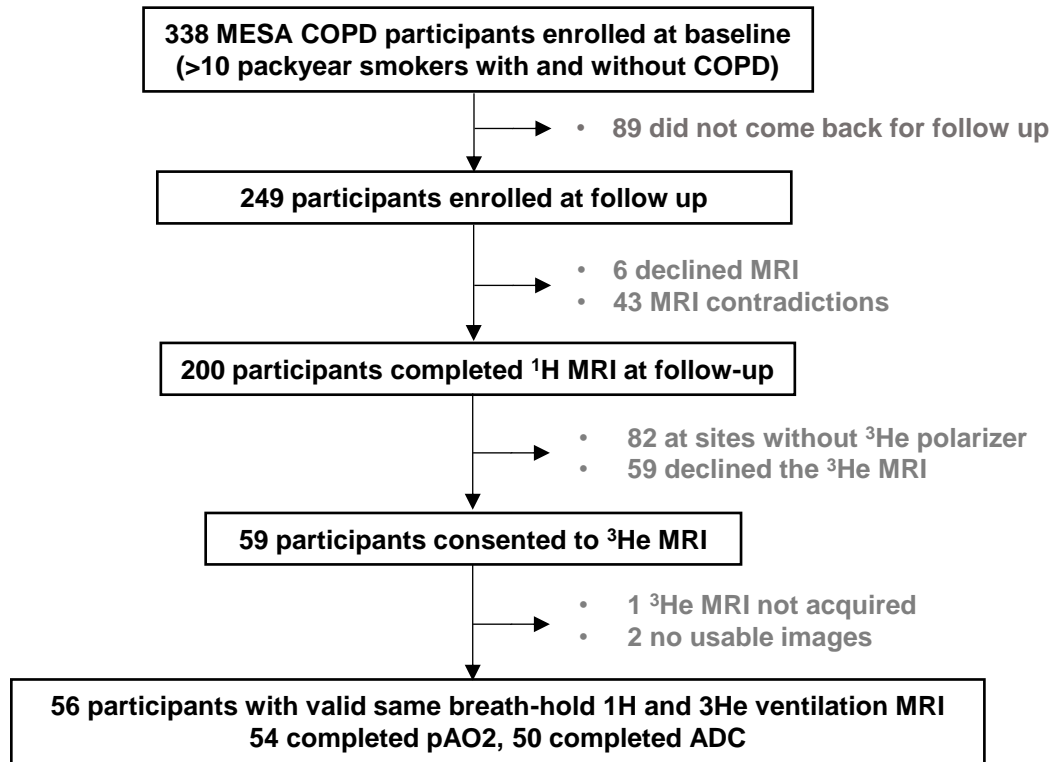

Supplementary Figure S1 MESA <sup>3</sup>He MRI Participant Flow Chart.

| Characteristic                                                | Upper left                    | Upper right                      | Middle left                   | Middle right                  | Lower left                   | Lower right                   |
|---------------------------------------------------------------|-------------------------------|----------------------------------|-------------------------------|-------------------------------|------------------------------|-------------------------------|
| pAO <sub>2</sub> mean, all values <sup>1</sup> – median [IQR] | 0.076 [0.064, 0.089]          | 0.086 [0.069, 0.101]             | 0.083 [0.073, 0.095]          | 0.100 [0.091, 0.111]          | 0.087 [0.077, 0.105]         | 0.107 [0.097, 0.122]          |
| pAO <sub>2</sub> SD, all values <sup>1</sup> – median [IQR]   | 0.057 [0.037, 0.073]          | 0.057 [0.042, 0.076]             | 0.044 [0.031, 0.065]          | 0.048 [0.036, 0.064]          | 0.053 [0.036, 0.086]         | 0.048 [0.035, 0.081]          |
| pAO <sub>2</sub> %negative – median [IQR]                     | 7.5 [3.4, 15.0]               | 5.5 [2.5, 13.4]                  | 3.8 [1.6, 7.5]                | 2.9 [1.1, 5.5]                | 3.9 [1.2, 10.8]              | 2.6 [0.9, 7.9]                |
| %emphysema -950 HU – median [IQR]                             | 2.20 [0.47, 5.29]             | 1.90 [0.39, 4.35]                | 2.03 [0.89, 5.30]             | 1.85 [0.87, 5.82]             | 1.72 [0.97, 6.39]            | 1.90 [0.41, 4.95]             |
| Visual emphysema severity (%) <sup>2</sup> – median [IQR]     | 0.06 [0, 3.20]                | 0.56 [0, 3.83]                   | 0.15 [0, 1.40]                | 0.21 [0, 3.67]                | 0 [0, 1.67]                  | 0 [0, 0.50]                   |
| Centrilobular emphysema, n=50                                 |                               |                                  |                               |                               |                              |                               |
| Severity (0-100) – median [IQR], range                        | 0 [0, 1.22]<br>Range: 0-59.00 | 0.23 [0, 2.63]<br>Range: 0-60.00 | 0 [0, 0.42]<br>Range: 0-22.50 | 0 [0, 1.75]<br>Range: 0-25.00 | 0 [0, 0.33]<br>Range: 0-6.00 | 0 [0, 0.23]<br>Range: 0-11.00 |
| Panlobular emphysema, n=50                                    |                               |                                  |                               |                               |                              |                               |
| Severity (0-100) – median [IQR], range                        | 0 [0, 0]<br>Range: 0-34.60    | 0 [0, 0]<br>Range: 0-44.80       | 0 [0, 0]<br>Range: 0-11.90    | 0 [0, 0]<br>Range: 0-10.00    | 0 [0, 0]<br>Range: 0-20.00   | 0 [0, 0]<br>Range: 0-25.00    |
| Paraseptal emphysema, n=50                                    |                               |                                  |                               |                               |                              |                               |

|                                              |                               |                               |                               |                               |                           |                            |
|----------------------------------------------|-------------------------------|-------------------------------|-------------------------------|-------------------------------|---------------------------|----------------------------|
| Severity (0-100) –<br>median [IQR],<br>range | 0 [0, 0.50]<br>Range: 0-56.67 | 0 [0, 1.00]<br>Range: 0-98.33 | 0 [0, 1.13]<br>Range: 0-20.33 | 0 [0, 0.83]<br>Range: 0-51.67 | 0 [0, 0]<br>Range: 0-6.00 | 0 [0, 0]<br>Range: 0-18.33 |
|----------------------------------------------|-------------------------------|-------------------------------|-------------------------------|-------------------------------|---------------------------|----------------------------|

<sup>1</sup>Per 0.01 change

<sup>2</sup>Calculated as the sum of the severity scores for centrilobular, panlobular, and paraseptal emphysema

IQR, interquartile range.

**Supplementary Table S1:** Distributions of regional measures (n=54)
